# Supplementary material for: Genome-Wide Analysis of Protein Disorder in Arabidopsis thaliana: Implications for Plant Environmental Adaptation
Source: PLoS One. 2013 Feb 7;8(2):e55524. doi: 10.1371/journal.pone.0055524 (PMC3567104; doi:10.1371/journal.pone.0055524)
Supplement: Additional Data File S4 — A table containing the average disorder (according with 4 different metrics) for the orthologous proteins belonging to the GO classes found to be enriched in disorder in A. thaliana respect to Human. (XLS) [file pone.0055524.s004.xls]

## Sheet: Sheet1
GO:0006457	0.15596	0.11842		GO:0006457	29.7161	30.3012
GO:0006221	0.18182	0		GO:0006221	11.4671	5.86222
GO:0042168	0.8	0.16667		GO:0042168	30.7252	23.4849
GO:0072528	0.14286	0.125		GO:0072528	11.3476	6.40739
GO:0051186	0.40541	0.32836		GO:0051186	14.7331	15.6905
GO:0009067	0.14286	0		GO:0009067	8.55888	4.57878
GO:0009220	0.4	0		GO:0009220	16.3704	6.47849
GO:0006520	0.2093	0.18182		GO:0006520	9.83701	9.17184
GO:0006220	0.18182	0		GO:0006220	11.4671	5.86222
GO:0046051	0.66667	0		GO:0046051	20.1954	4.90318
GO:0006228	0.66667	0		GO:0006228	20.1954	4.90318
GO:0006183	0.66667	0		GO:0006183	20.1954	4.90318
GO:0043436	0.28017	0.20513		GO:0043436	11.7508	10.3675
GO:0019752	0.28017	0.20513		GO:0019752	11.7508	10.3675
GO:0006082	0.28017	0.20382		GO:0006082	11.7508	10.3223
GO:0008652	0.19149	0.11538		GO:0008652	9.50192	7.44462
GO:0019400	0.16667	0		GO:0019400	6.59269	4.16436
GO:0046394	0.28866	0.18333		GO:0046394	13.7894	11.1419
GO:0016053	0.28866	0.18333		GO:0016053	13.7894	11.1419
GO:0009309	0.25	0.1		GO:0009309	9.71027	7.49954
GO:0046131	0.5	0		GO:0046131	18.6248	6.13798
GO:0006414	0	0		GO:0006414	29.0692	22.309
GO:0006778	0.71429	0.22222		GO:0006778	25.5614	18.5363
GO:0006720	0.19048	0.11111		GO:0006720	11.5889	10.4169
GO:0034641	0.31792	0.25549		GO:0034641	32.8506	28.2405
GO:0006807	0.31138	0.25295		GO:0006807	32.2894	28.025
GO:0033013	0.71429	0.22222		GO:0033013	25.5614	18.5363
GO:0010467	0.2719	0.24515		GO:0010467	38.3238	30.2156
GO:0006139	0.32655	0.25777		GO:0006139	36.4585	29.9601
GO:0034645	0.23605	0.22733		GO:0034645	36.0703	28.1653
GO:0009059	0.23688	0.22651		GO:0009059	35.8971	28.1031
GO:0090304	0.32962	0.27069		GO:0090304	40.3982	31.1383
GO:0006289	0.23077	0.22222		GO:0006289	37.8428	39.2513
GO:0006779	0.625	0.14286		GO:0006779	19.8617	16.2726
GO:0016070	0.34326	0.27378		GO:0016070	42.4024	31.0376
GO:0033014	0.625	0.14286		GO:0033014	19.8617	16.2726
GO:0042364	0	0		GO:0042364	7.02553	4.78719
GO:0006826	0.88889	0.42857		GO:0006826	24.7932	17.9486
GO:0006351	0.32754	0.26387		GO:0006351	48.0117	30.3122
GO:0006355	0.35315	0.26126		GO:0006355	48.8869	29.4304
GO:0042440	0.66667	0.09091		GO:0042440	23.6184	14.8964
GO:0051252	0.35274	0.26071		GO:0051252	48.9382	29.4721
GO:0010468	0.35045	0.26271		GO:0010468	47.7264	29.9635
GO:0032774	0.32659	0.26342		GO:0032774	47.9326	30.2961
GO:2000112	0.34727	0.25868		GO:2000112	48.0016	29.6499
GO:0019219	0.34412	0.2585		GO:0019219	47.125	29.9648
GO:0010556	0.34727	0.25997		GO:0010556	48.0016	29.6511
GO:0051171	0.34412	0.2585		GO:0051171	47.125	29.9648
GO:0031326	0.34395	0.25734		GO:0031326	47.8796	29.6253
GO:0060255	0.32915	0.25891		GO:0060255	43.2986	29.5136
GO:0009889	0.34395	0.25862		GO:0009889	47.8796	29.6266
GO:0080090	0.32458	0.25499		GO:0080090	42.9208	29.663
GO:0019222	0.32294	0.25444		GO:0019222	42.2636	29.8046
GO:0031323	0.33421	0.25354		GO:0031323	45.5183	29.9529
GO:0022900	0.42308	0.27778		GO:0022900	21.7468	20.703
GO:0065007	0.27119	0.22665		GO:0065007	32.109	27.6886
GO:0055072	0.85714	0.42857		GO:0055072	26.7826	17.9486
GO:0000377	0.47059	0.26667		GO:0000377	59.2055	55.8514
GO:0050789	0.26928	0.2384		GO:0050789	33.454	28.3973
GO:0000375	0.47059	0.26667		GO:0000375	59.2055	55.8514
GO:0050794	0.27457	0.24037		GO:0050794	34.5744	28.3747
	0.36563	0.189174			29.5104	21.2615
	6:nlon				1: % dis

## Sheet: Sheet3
				%dis						NUM_LONG_DIS_C					NUM_LONG_DIS					NUM_DIS_RES
GO		%ort		Ath	Hsa	Ath ≠ Hsa	Ath > Hsa			Ath	Hsa	Ath ≠ Hsa	Ath > Hsa		Ath	Hsa	Ath ≠ Hsa	Ath > Hsa		Ath	Hsa	Ath ≠ Hsa	Ath > Hsa
GO:0006457		32.8014		29.7161	30.3012					0.15596	0.11842				1.01835	1.06579				105.312	105.579
GO:0006221		30		11.4671	5.86222					0.18182	0				0.63636	0.28571				40.7273	24.4286
GO:0042168		29.6296		30.7252	23.4849					0.8	0.16667				1.1	1				92.9	74.6667
GO:0072528		27.8481		11.3476	6.40739					0.14286	0.125				0.71429	0.375				44.2857	25.375
GO:0051186		26.4095		14.7331	15.6905					0.40541	0.32836				0.65766	0.71642				53.1802	64.3731
GO:0009067		26.3889		8.55888	4.57878					0.14286	0				0.21429	0				30.7143	18.8
GO:0009220		23.6842		16.3704	6.47849					0.4	0				0.6	0				47.8	22.5
GO:0006520		21.7435		9.83701	9.17184					0.2093	0.18182				0.44186	0.43182				48.4341	48.5
GO:0006220		21.6867		11.4671	5.86222					0.18182	0				0.63636	0.28571				40.7273	24.4286
GO:0046051		20.8333		20.1954	4.90318					0.66667	0				0.66667	0				46.6667	10
GO:0006228		20.8333		20.1954	4.90318					0.66667	0				0.66667	0				46.6667	10
GO:0006183		20.8333		20.1954	4.90318					0.66667	0				0.66667	0				46.6667	10
GO:0043436		20.5836		11.7508	10.3675					0.28017	0.20513				0.50431	0.47436				54.4267	51.109
GO:0019752		20.5836		11.7508	10.3675					0.28017	0.20513				0.50431	0.47436				54.4267	51.109
GO:0006082		20.3665		11.7508	10.3223					0.28017	0.20382				0.50431	0.47134				54.4267	50.8854
GO:0008652		20.2778		9.50192	7.44462					0.19149	0.11538				0.3617	0.23077				39.3192	30.4615
GO:0019400		20.2703		6.59269	4.16436					0.16667	0				0.5	0.22222				27.5	18.4444
GO:0046394		19.2638		13.7894	11.1419					0.28866	0.18333				0.49485	0.43333				53.4227	45.7833
GO:0016053		19.2638		13.7894	11.1419					0.28866	0.18333				0.49485	0.43333				53.4227	45.7833
GO:0009309		19.1111		9.71027	7.49954					0.25	0.1				0.39286	0.23333				39.7321	30.7
GO:0046131		18.9189		18.6248	6.13798					0.5	0				0.75	0				51	18
GO:0006414		17.1642		29.0692	22.309					0	0				0.71429	0.55556				41	33.2222
GO:0006778		17.037		25.5614	18.5363					0.71429	0.22222				1	0.77778				81.3571	61.3333
GO:0006720		16.8831		11.5889	10.4169					0.19048	0.11111				0.42857	0.33333				51.6191	52.5
GO:0034641		16.5901		32.8506	28.2405					0.31792	0.25549				1.43834	1.33242				170.267	164.784
GO:0006807		16.5584		32.2894	28.025					0.31138	0.25295				1.4111	1.32094				167.312	163.495
GO:0033013		16.5468		25.5614	18.5363					0.71429	0.22222				1	0.77778				81.3571	61.3333
GO:0010467		16.2703		38.3238	30.2156					0.2719	0.24515				1.45752	1.31129				169.639	160.707
GO:0006139		16.1172		36.4585	29.9601					0.32655	0.25777				1.6113	1.41926				191.677	176.382
GO:0034645		15.7628		36.0703	28.1653					0.23605	0.22733				1.35336	1.21765				156.75	147.022
GO:0009059		15.6809		35.8971	28.1031					0.23688	0.22651				1.34752	1.21446				155.909	146.625
GO:0090304		15.6526		40.3982	31.1383					0.32962	0.27069				1.74131	1.45749				209.951	182.506
GO:0006289		14.966		37.8428	39.2513					0.23077	0.22222				2.15385	2.33333				249.846	281.778
GO:0006779		14.7059		19.8617	16.2726					0.625	0.14286				0.875	0.57143				75.75	55.8571
GO:0016070		14.6614		42.4024	31.0376					0.34326	0.27378				1.77933	1.40874				210.173	172.584
GO:0033014		13.8889		19.8617	16.2726					0.625	0.14286				0.875	0.57143				75.75	55.8571
GO:0042364		13.7255		7.02553	4.78719					0	0				0.22222	0				19.6667	16.2
GO:0006826		12.9032		24.7932	17.9486					0.88889	0.42857				1	0.57143				79.7778	52.1429
GO:0006351		12.5719		48.0117	30.3122					0.32754	0.26387				1.95072	1.35966				219.629	162.81
GO:0006355		12.5654		48.8869	29.4304					0.35315	0.26126				1.97902	1.32793				212.049	155.121
GO:0042440		12.5		23.6184	14.8964					0.66667	0.09091				0.94444	0.54545				80.1111	47.5455
GO:0051252		12.4762		48.9382	29.4721					0.35274	0.26071				1.97603	1.33036				212.726	155.37
GO:0010468		12.4577		47.7264	29.9635					0.35045	0.26271				1.94864	1.36441				219.357	163.608
GO:0032774		12.4488		47.9326	30.2961					0.32659	0.26342				1.94509	1.35738				219.237	162.683
GO:2000112		12.423		48.0016	29.6499					0.34727	0.25868				1.90675	1.32292				215.039	156.932
GO:0019219		12.3552		47.125	29.9648					0.34412	0.2585				1.92353	1.35204				212.603	159.896
GO:0010556		12.2907		48.0016	29.6511					0.34727	0.25997				1.90675	1.32409				215.039	157.3
GO:0051171		12.1961		47.125	29.9648					0.34412	0.2585				1.92353	1.35204				212.603	159.896
GO:0031326		12.0172		47.8796	29.6253					0.34395	0.25734				1.91083	1.3247				215.379	157.147
GO:0060255		12.012		43.2986	29.5136					0.32915	0.25891				1.79146	1.36899				199.761	162.27
GO:0009889		11.9695		47.8796	29.6266					0.34395	0.25862				1.91083	1.32586				215.379	157.512
GO:0080090		11.9647		42.9208	29.663					0.32458	0.25499				1.7494	1.35791				197.955	159.432
GO:0019222		11.5491		42.2636	29.8046					0.32294	0.25444				1.7706	1.38609				200.503	165.058
GO:0031323		11.3092		45.5183	29.9529					0.33421	0.25354				1.84737	1.3685				212.055	161.671
GO:0022900		10.9726		21.7468	20.703					0.42308	0.27778				0.57692	0.5				51.5385	48.8333
GO:0065007		10.9515		32.109	27.6886					0.27119	0.22665				1.39887	1.28988				161.614	162.188
GO:0055072		10.9375		26.7826	17.9486					0.85714	0.42857				1	0.57143				75.5714	52.1429
GO:0000377		10.596		59.2055	55.8514					0.47059	0.26667				2.23529	2.2				274.882	229.067
GO:0050789		10.5932		33.454	28.3973					0.26928	0.2384				1.43363	1.31176				165.855	162.138
GO:0000375		10.3896		59.2055	55.8514					0.47059	0.26667				2.23529	2.2				274.882	229.067
GO:0050794		10.2163		34.5744	28.3747					0.27457	0.24037				1.46387	1.30222				169.257	158.013
GO:0019748		9.60699		9.56454	6.15921					0.14286	0				0.14286	0				45.1786	29.875
GO:0006721		8.67052		10.0349	8.9636					0.125	0				0.125	0				50	46.4286
GO:0006887		7.41627		29.8048	26.2437					0.04762	0				1.85714	2.2				218.095	199.8
GO:0016101		7.24638		11.1343	13.1388					0	0				0	0				54.5	67
GO:0070887		4.43605		20.8119	14.4772					0.29268	0.07547				0.95122	0.56604				105.488	81.7925
GO:0016116		4.16667		11.0526	4.4905					1	0				1	0				63	26
GO:0016108		4.16667		11.0526	4.4905					1	0				1	0				63	26
GO:0018904		3.81679		33.3025	24.4025					1	0.5				1	1				87	73.5
GO:0006662		3.81679		33.3025	24.4025					1	0.5				1	1				87	73.5
GO:0032940		3.57143		29.8048	26.2437					0.04762	0				1.85714	2.2				218.095	199.8
GO:0006081		3.33333		3.74016	6.86456					0	1				0	1				19	37
GO:0046903		3.10621		29.8048	26.2437					0.04762	0				1.85714	2.2				218.095	199.8
GO:0009410		3.01508		13.5417	3.50276					0	0				0	0				65	18.6
GO:0071310		2.90221		20.8091	22.466					0.4	0.19048				1.04	1				120.64	141
GO:0006641		1.76991		26.1538	20.4918					1	1				1	1				136	100
GO:0009617		1.7094		17.9343	13.4029					0.8	0.33333				0.8	0.66667				76.2	55.3333
GO:0006639		1.68067		26.1538	20.4918					1	1				1	1				136	100
GO:0006638		1.68067		26.1538	20.4918					1	1				1	1				136	100
GO:0042742		1.3587		12.3879	8.58087					0.66667	0.5				0.66667	0.5				80	53.5
Averages & stat. test				27.2085	19.9063	0.0005269	0.0002635			0.398419	0.220486	1.482e-05	7.409e-06		1.11201	0.872302	0.01665	0.008327		120.886	98.4985	0.04864	0.02432
-----------
GO		Go term
%ort		Percentage of proteins within that class linked by Hsa<->Ath orthology relationships (calculated respect to to the total number of proteins in the class (Hsa+Ath))
Ath		A. thaliana
Hsa		H. sapiens
%dis		Average percentage of disordered residues
NUM_LONG_DIS_C		Number of long disordered segments in the C terminal region
NUM_LONG_DIS		Total number of long disordered segments
NUM_DIS_RES		Average number of disordered residues
Ath ≠ Hsa		P-value of the t-test (two tails -means are different-)
Ath > Hsa		P-value of the t-test (one tail -mean in Ath larger than Hsa-)
