# Supplementary material for: Genome-Wide Analysis of Protein Disorder in Arabidopsis thaliana: Implications for Plant Environmental Adaptation
Source: PubMed Central journal article supplement (PMC3567104; doi:10.1371/journal.pone.0055524), 2013-02-07
Supplement: pone.0055524.s001.pdf [file pone.0055524.s001.pdf]

## SUPPLEMENTAL MATERIAL

### **Genome-wide analysis of protein disorder in *Arabidopsis thaliana*. Implications for environmental adaptation**

Natalia Pietrosevoli<sup>1,3</sup>, Juan A. García-Martín<sup>2</sup>, Roberto Solano<sup>2\*</sup> and Florencio Pazos<sup>1\*</sup>

<sup>1</sup>Computational System Biology Group, National Centre for Biotechnology (CNB-CSIC).

<sup>2</sup>Plant Molecular Genetics Department, National Centre for Biotechnology (CNB-CSIC).

<sup>3</sup>Department of Bioengineering, Rice University. Houston, Texas.

Corresponding authors: fpazos@cnb.csic.es, rsolano@cnb.csic.es

|                | Mean content of disorder (%) |              | Mean number of LDW |              | Proteins with at least one LDW (%) |              | Mean number of residues belonging to LDWs |              |
|----------------|------------------------------|--------------|--------------------|--------------|------------------------------------|--------------|-------------------------------------------|--------------|
|                | <i>A.th.</i>                 | <i>H.sa.</i> | <i>A.th.</i>       | <i>H.sa.</i> | <i>A.th.</i>                       | <i>H.sa.</i> | <i>A.th.</i>                              | <i>H.sa.</i> |
| lupred (short) | 17.0                         | 22.4         | 0.6                | 1.4          | 36.3                               | 60.9         | 9.0                                       | 14.9         |
| lupred (long)  | 16.8                         | 24.5         | 0.6                | 1.3          | 32.8                               | 56.6         | 10.5                                      | 17.6         |
| VSL2           | 38.9                         | 44.9         | 1.2                | 1.9          | 68.1                               | 78.9         | 26.1                                      | 34.4         |

**Table 1S. Summary of intrinsic disorder metrics for *A. thaliana* and *H. sapiens*. Results shown for the different prediction methods.**

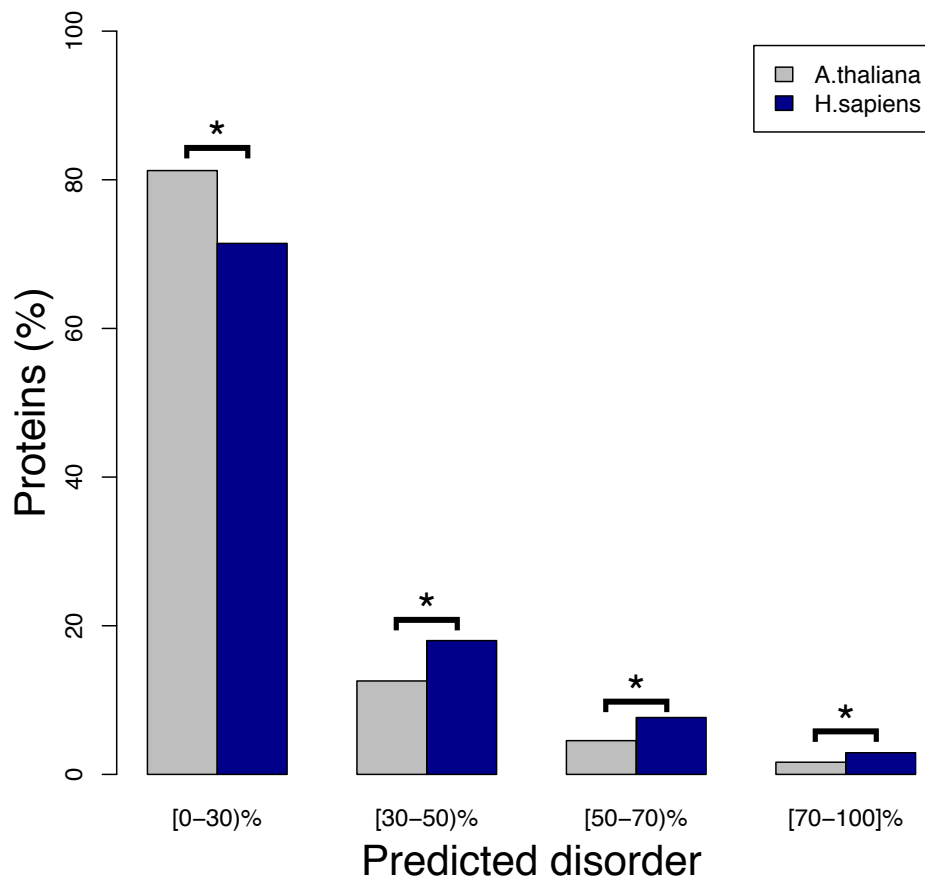

**Figure 1S. Fraction of proteins with different degrees of predicted disorder in *A. thaliana* and Human.** Protein disorder (as the percentage of disordered residues with respect to the sequence length) is binned into different ranges. Data based on lupred (short) predictions.

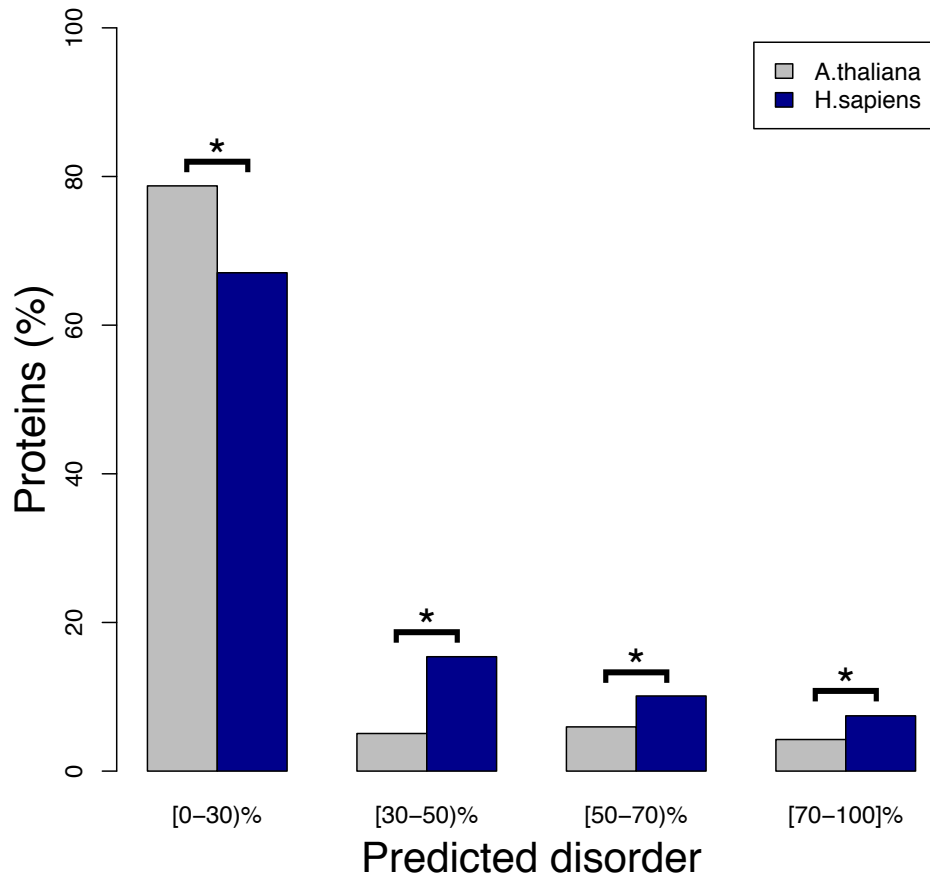

**Figure 2S. Fraction of proteins with different degrees of predicted disorder in *A. thaliana* and Human.** Protein disorder (as the percentage of disordered residues with respect to the sequence length) is binned into different ranges. Data based on lupred (long) predictions.

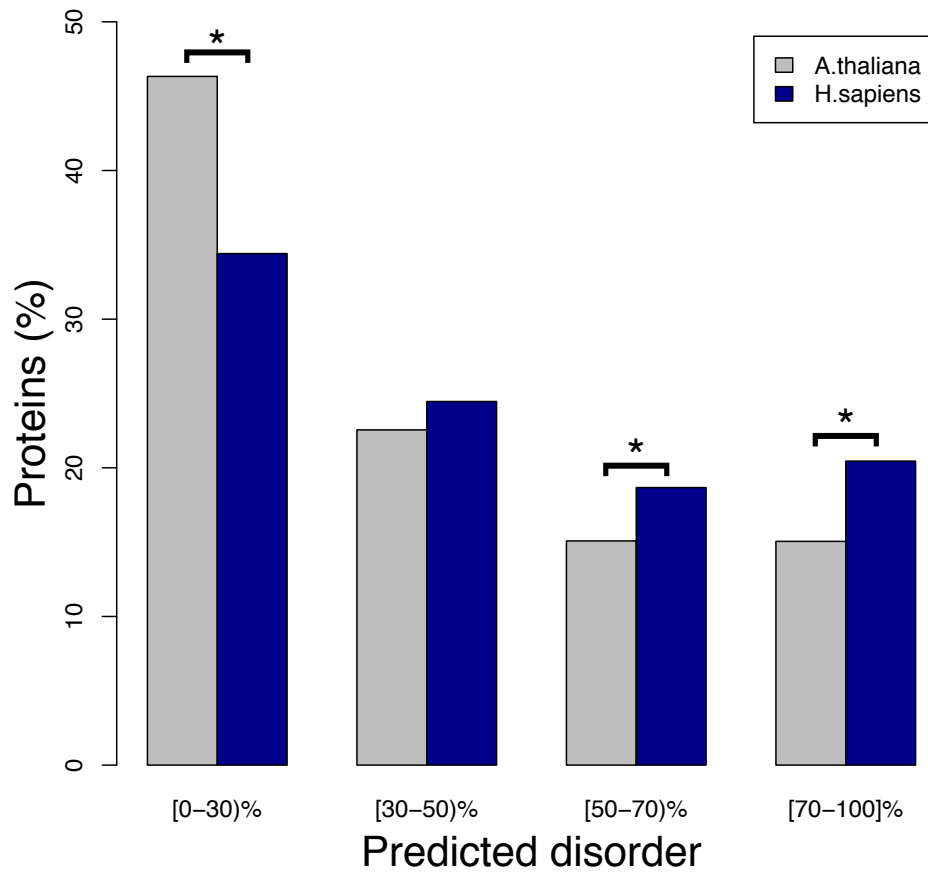

**Figure 3S. Fraction of proteins with different degrees of predicted disorder in *A. thaliana* and Human.** Protein disorder (as the percentage of disordered residues with respect to the sequence length) is binned into different ranges. Data based on VSL2 predictions.

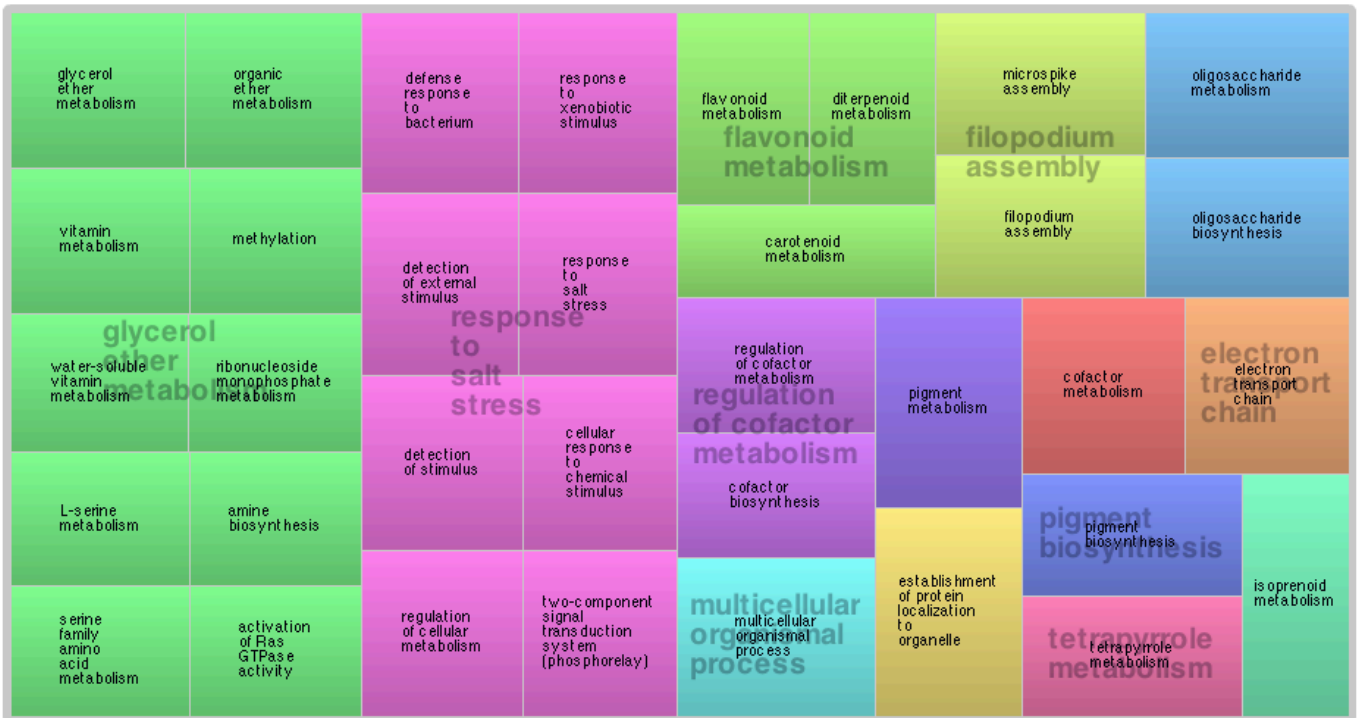

**Figure 4S. Representation of the GO “Biological Processes” comparatively enriched in disordered proteins in *A. thaliana* respect to *H. sapiens*.** Disordered proteins here are again those with 1 or more LDWs based on VSL2 predictions. Figure adapted from REVIGO, a system for summarizing and visualizing lists of GO terms. Each rectangle represents a cluster of related terms labelled according to a representative term. Rectangles are grouped in “superclusters” (identified with the same color) based on SimRel semantic similarity measure.

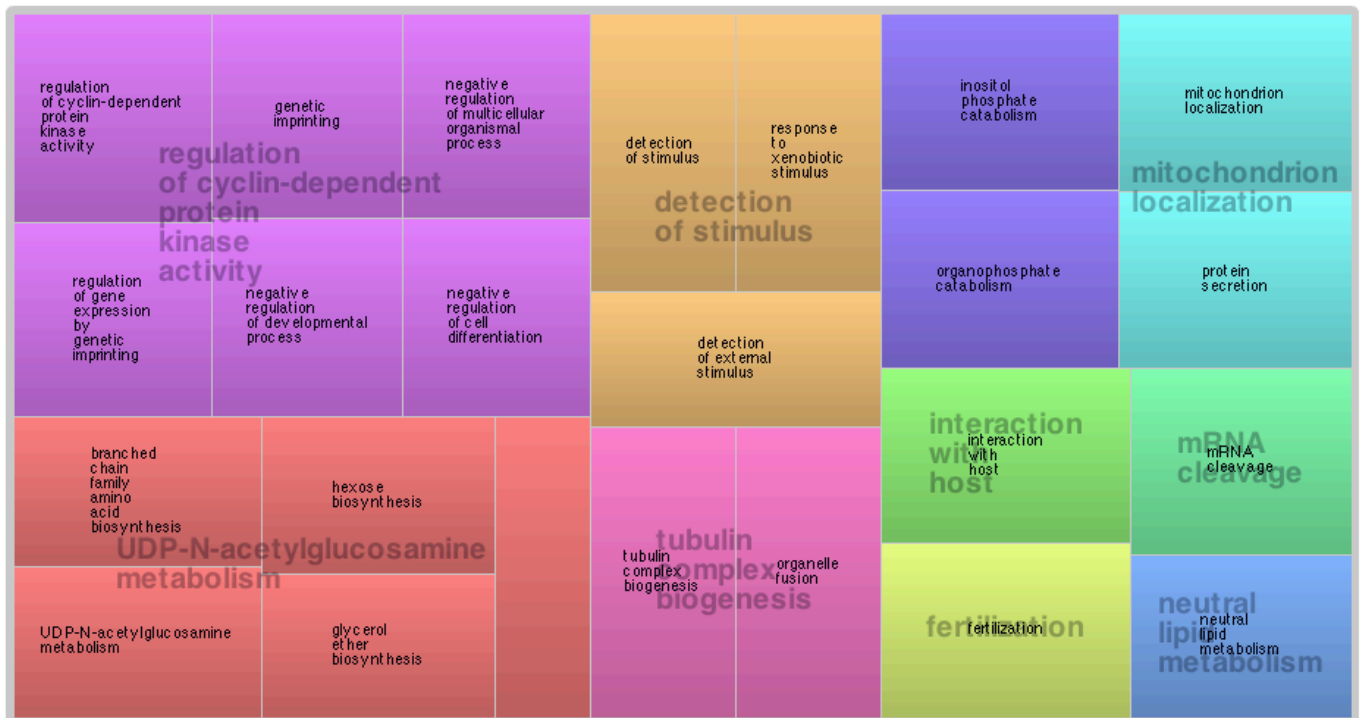

**Figure 5S. Representation of the GO “Biological Processes” comparatively enriched in disordered proteins in *A. thaliana* respect to *H. sapiens*.** Disordered proteins here are again those with 1 or more LDWs based on lupred (option “long”) predictions. Same REVIGO representation adaptation as in Figure 4S.

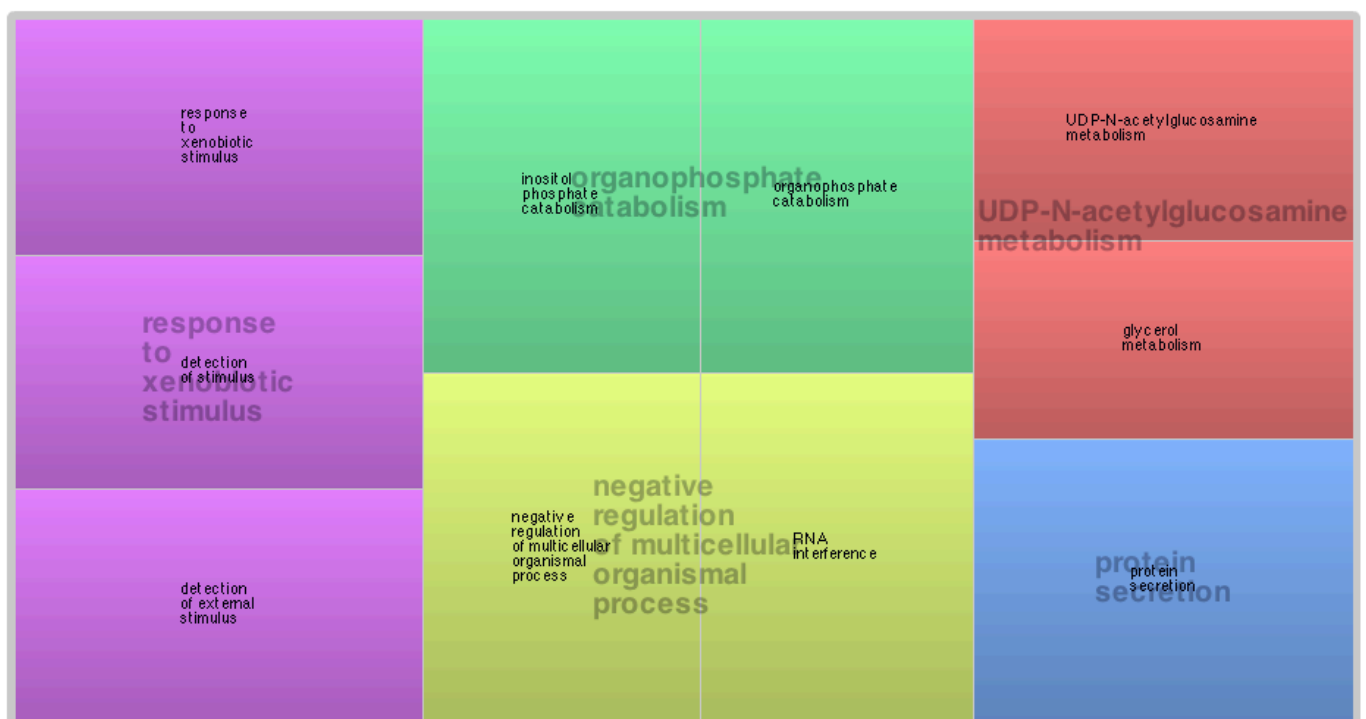

**Figure 6S. Representation of the GO “Biological Processes” comparatively enriched in disordered proteins in *A. thaliana* respect to *H. sapiens*.** Disordered proteins here are again those with 1 or more LDWs based on Lupred (option “short”) predictions. Same REVIGO representation adaptation as in Figure 4S.

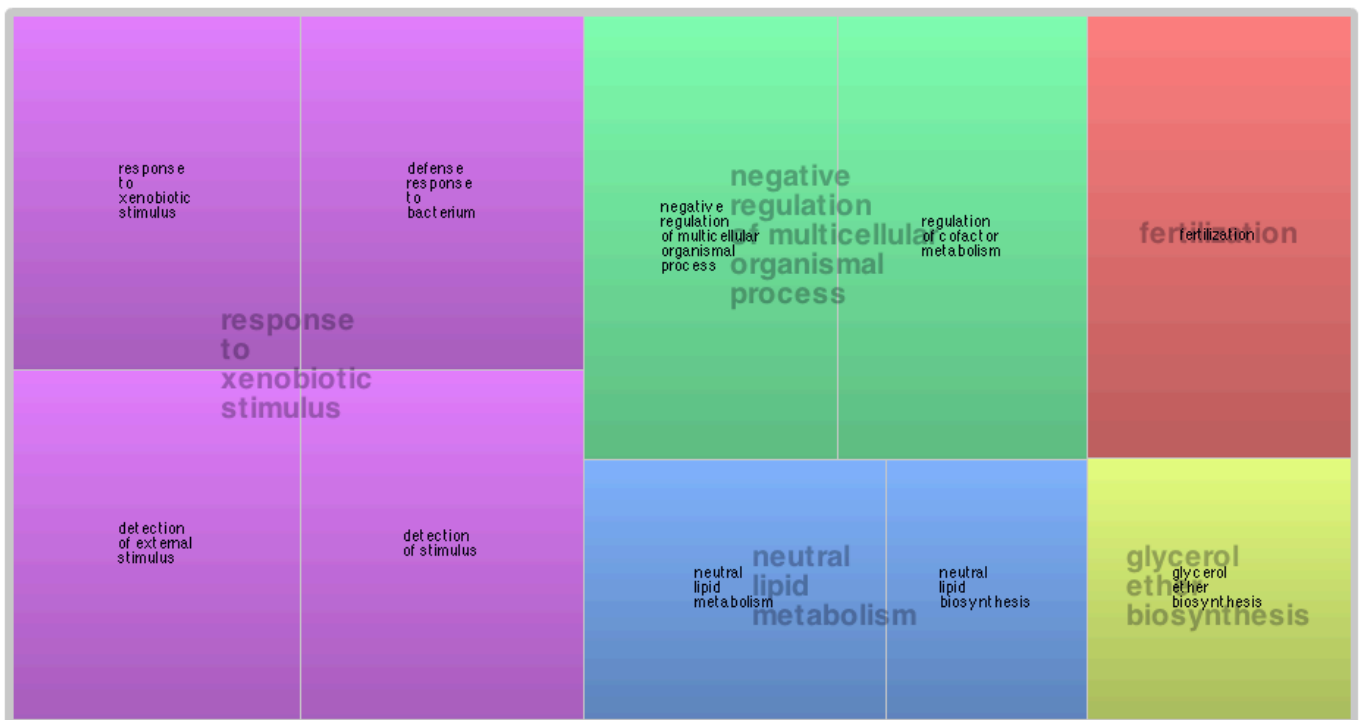

**Figure 7S. Representation of the GO “Biological Processes” comparatively enriched in residues belonging to disordered binding regions (DBR) in *A. thaliana* with respect to *Human*.** DBR are calculated based on ANCHOR predictions. Same REVIGO representation adaptation as in Figure 4S.
